# Supplementary material
Source: bioRxiv or medRxiv preprint supplement (https://www.biorxiv.org/highwire/filestream/44048/field_highwire_adjunct_files/2/130948-3.pdf)
Supplement: Supplementary file [file 130948-3.pdf]

# Supplementary Figure 3

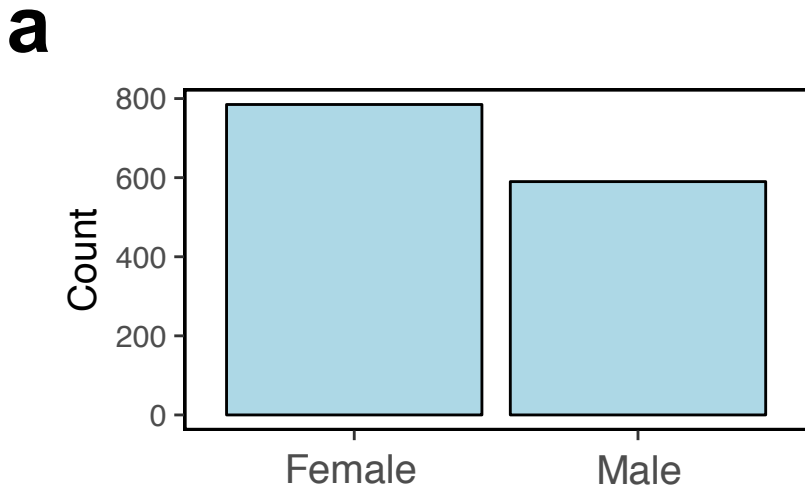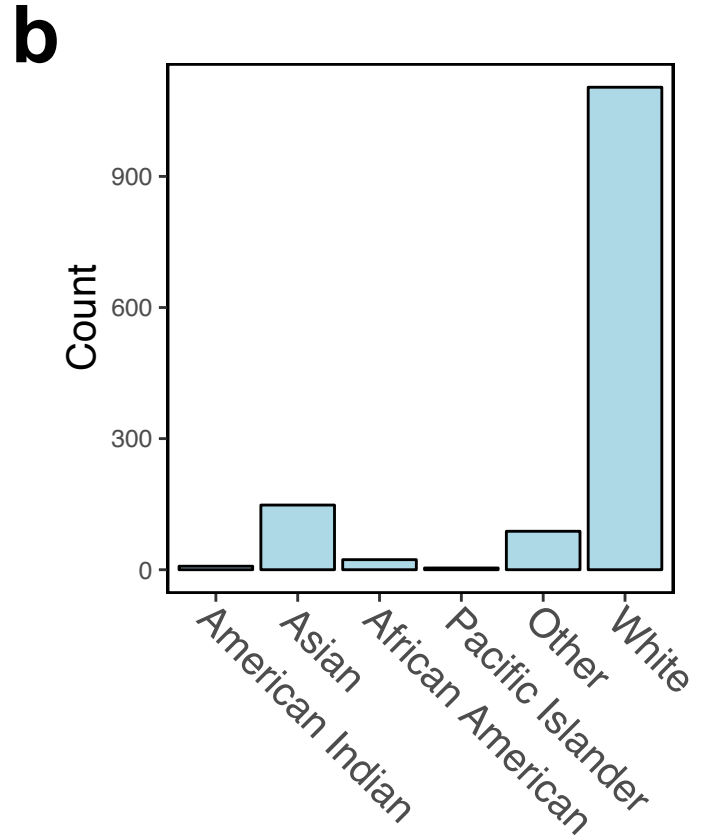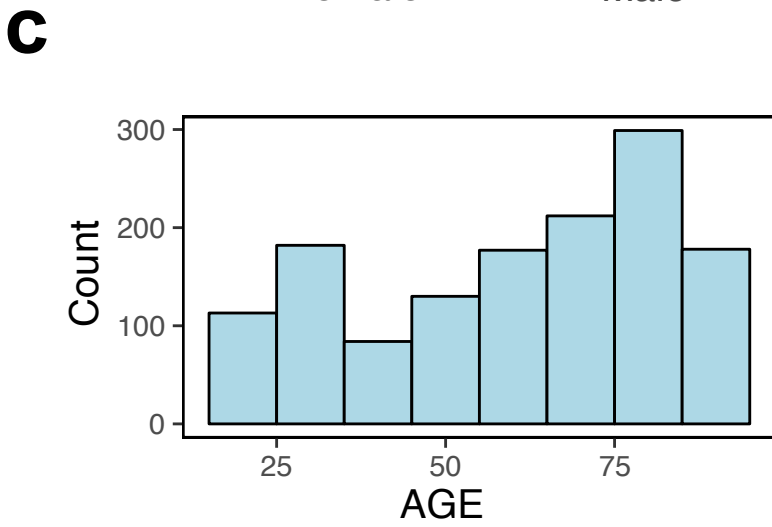

Supplementary Figure 3: Demographics of subjects included in the meta-analysis of 10 human immunology studies. Bar graphs show the distribution of gender (**a**), race (**b**) and age (**c**).
